# Supplementary material
Source: PubMed Central journal article supplement (PMC4070036)
Supplement: 97320630010273S1.pdf [file 97320630010273S1.pdf]

## Supplementary material:

**Table 1:** Virtual screening and Docking results of top 10 molecules with their ZINC ID, IUPAC names, 2D- structures and chemgauss4 scores, Binding energy, Ligand Efficiency, Electrostatic Energy and Hydrogen bonds compared against Sunitinib (Reference Molecule).

| S. No. | ZINC ID/IUPAC Name                                                                                                                                         | 2D- STRUCTURE                                                                       | CHEM GAUSS 4 SCORE | Binding Energy | Ligand Efficiency | Electrostatic Energy | No. of hydrogen bonds |
|--------|------------------------------------------------------------------------------------------------------------------------------------------------------------|-------------------------------------------------------------------------------------|--------------------|----------------|-------------------|----------------------|-----------------------|
| 1.     | Sunitinib<br>(Z)-N-(2-(Diethylamino)ethyl)-5-((5-fluoro-2-oxoindolin-3-ylidene)methyl)-2,4-dimethyl-1H-pyrrole-3-carboxamide                               | 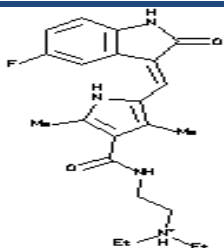   | ---                | -3.18          | -0.11             | -0.98                | 1                     |
| 2.     | ZINC04652104<br>N'-[(E)-bicyclo[2.2.1]hept-5-en-2-ylmethylidene]-2-hydroxy-2,2-diphenylacetohydrazide                                                      |    | -11.532516         | -3.41          | -0.13             | -0.4                 | 1                     |
| 3.     | ZINC00484682<br>N'-(4-isopropylbenzylidene)-1H-pyrazole-5-carbohydrazide                                                                                   |   | -11.364313         | -4.15          | -0.22             | -0.21                | 2                     |
| 4.     | ZINC00677022<br>N-(4-[1,3]oxazolo[4,5-b]pyridin-2-ylphenyl)-1-naphthamide                                                                                  |  | -11.015993         | -3.62          | -0.13             | -0.23                | 1                     |
| 5.     | ZINC09065134<br>N'-[(3E)-5-bromo-2-oxo-1,2-dihydro-3H-indol-3-ylidene]-3-(naphthalen-2-yl)-1H-pyrazole-5-carbohydrazide                                    |  | -10.864721         | -4.76          | -0.16             | -0.48                | 2                     |
| 6.     | ZINC08439539<br>1'-allyl-2-benzyl-4-[2-(methylsulfanyl)ethyl]-1',3a,3',4,6,6a-hexahydrospiro(pyrrolo[3,4-c]pyrrole-6,3'-[2'H]-indole)-1,2,3(2H,3aH)-trione |  | -10.814221         | -2.61          | -0.08             | -0.5                 | 2                     |
| 7.     | ZINC00626508<br>4-benzoyl-5-(2-chlorophenyl)-3-hydroxy-1-[2-(1H-indol-3-yl)ethyl]-1,5-dihydro-2H-pyrrol-2-one                                              |  | -10.766582         | -3.33          | -0.1              | -0.38                | 2                     |
| 8.     | ZINC05944355<br>2-[[[4-tert-butylphenyl]carbonyl]amino]-N-(pyridin-3-ylmethyl)-4,5,6,7-tetrahydro-1-benzothiophene-3-carboxamide                           |  | -10.676544         | -4.88          | -0.15             | -0.15                | 1                     |
| 9.     | ZINC01414763<br>4-[(4-fluorophenyl)carbonyl]-3-hydroxy-5-(4-hydroxyphenyl)-1-[2-(1H-indol-3-yl)ethyl]-1,5-dihydro-2H-pyrrol-2-one                          |  | -10.668797         | -3.06          | -0.09             | -0.12                | 3                     |

|     |              |                                                                                   |            |       |       |       |   |
|-----|--------------|-----------------------------------------------------------------------------------|------------|-------|-------|-------|---|
| 10. | ZINC08424401 | 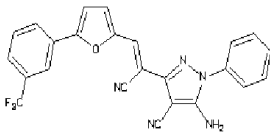 | -10.663716 | -3.55 | -0.11 | -0.27 | 0 |
| 11. | ZINC00703128 |  | -10.663416 | -3.71 | -0.1  | -0.33 | 3 |
